# Supplementary material
Source: Springer Nature journal article supplement (https://www.springermedizin.de/resource/supplementary/12879_2013_2765_MOESM2_ESM.pdf/9445352)

# 25 OH Vitamin D in HIV vs Hepatitis Monoinfected Patients

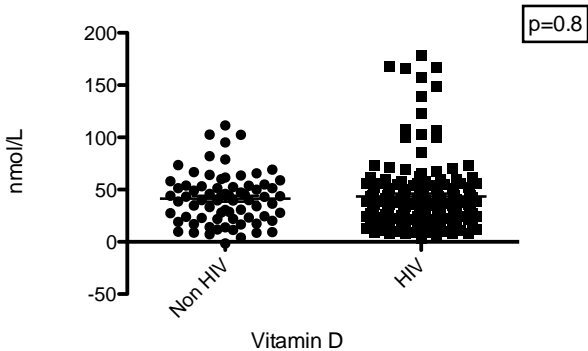

Supplement: MOESM2 [file 9445352]
